# Supplementary material for: The SiaABC threonine phosphorylation pathway controls biofilm formation in response to carbon availability in Pseudomonas aeruginosa
Source: PubMed Central journal article supplement (PMC7647112; doi:10.1371/journal.pone.0241019), 2020-11-06

## Glucose

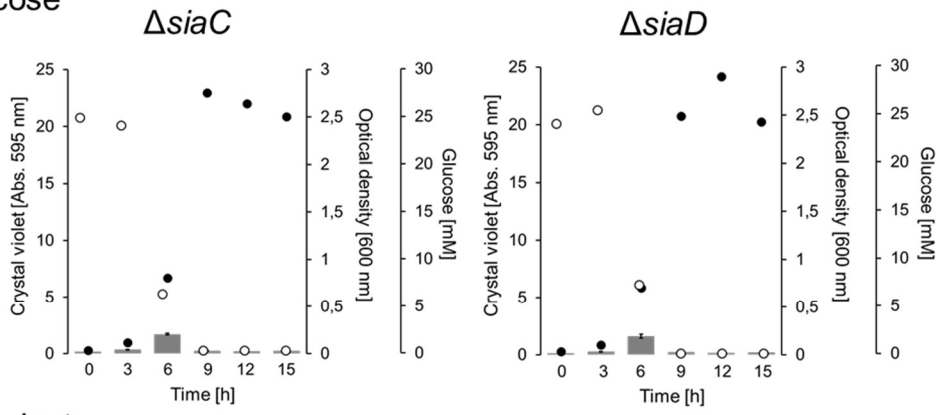

## Succinate

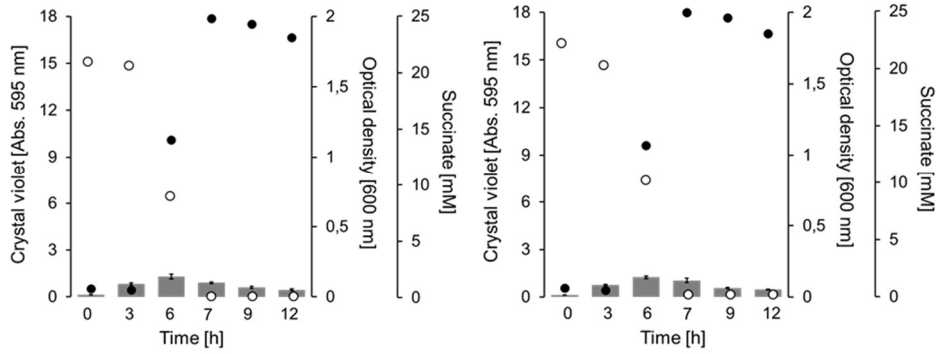

## Ethanol

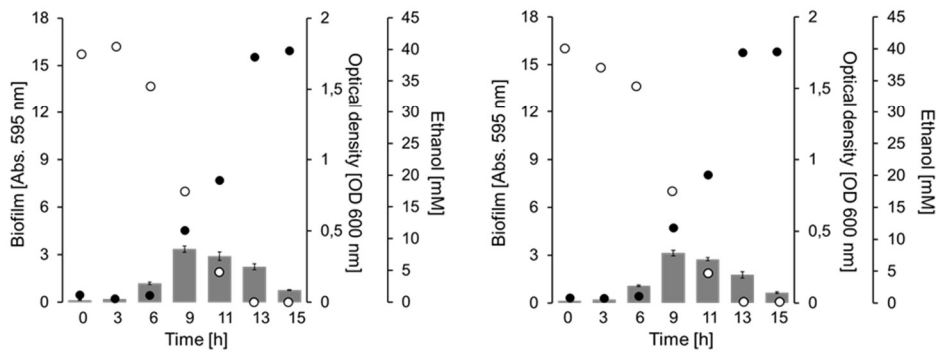

## 2,3 Butanediol

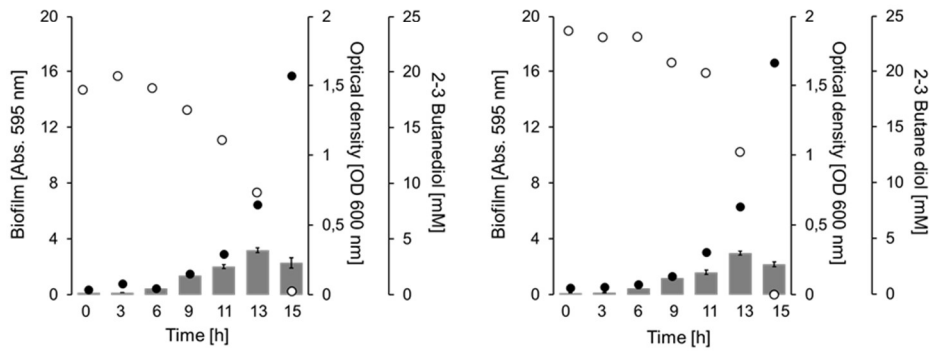

Supplement: pone.0241019.s001.pdf [file pone.0241019.s001.pdf]
