# Supplementary material for: The SiaABC threonine phosphorylation pathway controls biofilm formation in response to carbon availability in Pseudomonas aeruginosa
Source: PubMed Central journal article supplement (PMC7647112; doi:10.1371/journal.pone.0241019), 2020-11-06
Supplement: pone.0241019.s002.pdf [file pone.0241019.s002.pdf]

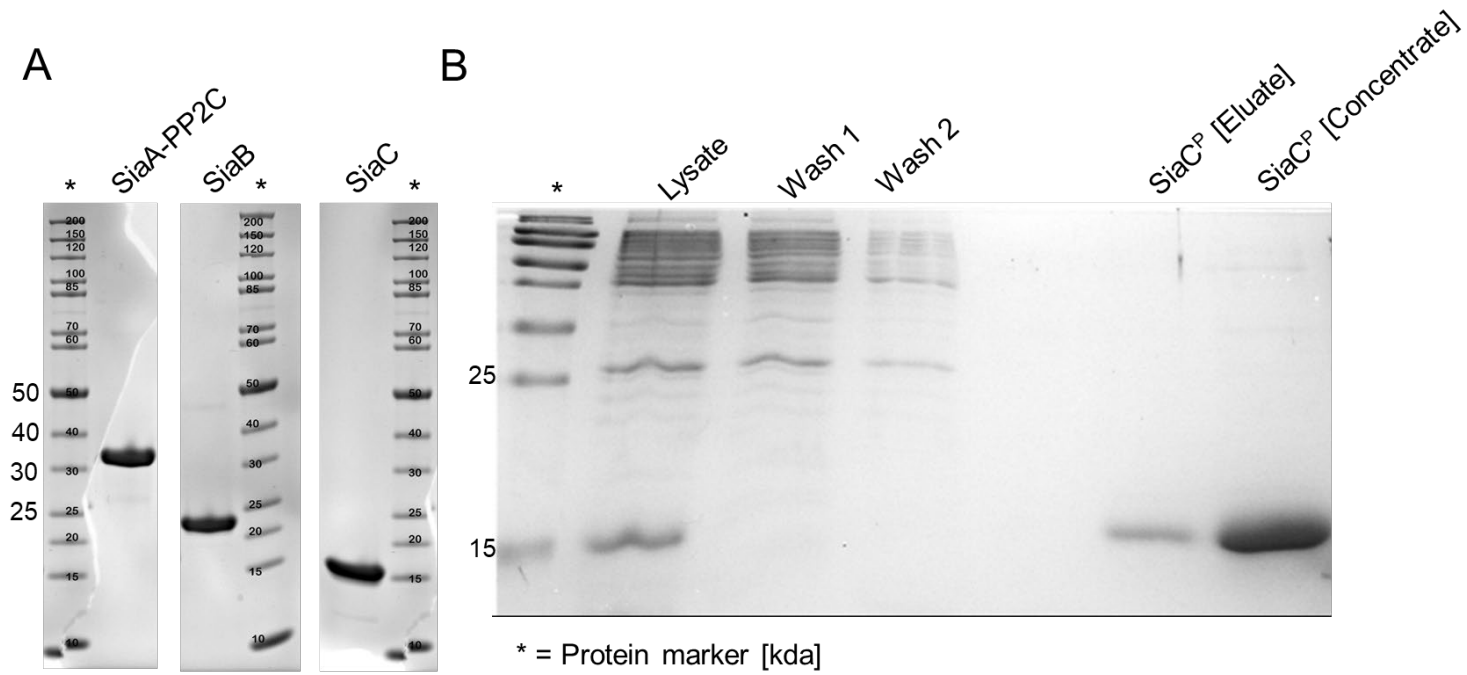

**Fig S2:** SDS-PAGE analysis of the purified SiaA-PP2C, SiaB, SiaC and SiaAPP2C\* protein samples after purification. A) The purified SiaA phosphatase domain (amino acids 386-663 of the SiaA protein sequence; Genbank ID: NP\_248862), the SiaB (Genbank-ID: 248862) and SiaC (Genbank-ID: NP\_248860) proteins produced in *E. coli* after affinity chromatography and subsequent gel filtration. B) The purified SiaC protein (Genbank-ID: NP\_248860) produced in the  $\Delta siaA$  mutant (SiaC<sup>P</sup>) after affinity chromatography (eluate) and subsequent protein concentration.
