# Supplementary material for: The SiaABC threonine phosphorylation pathway controls biofilm formation in response to carbon availability in Pseudomonas aeruginosa
Source: PubMed Central journal article supplement (PMC7647112; doi:10.1371/journal.pone.0241019), 2020-11-06

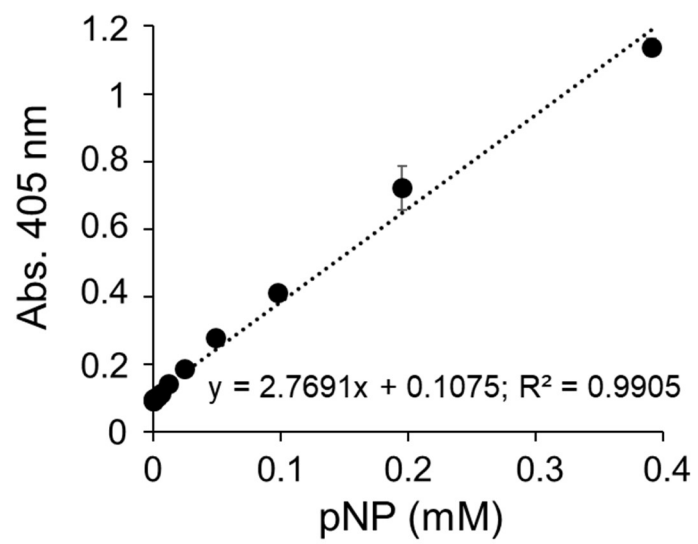

Supplement: pone.0241019.s003.pdf [file pone.0241019.s003.pdf]
