# Supplementary material for: The SiaABC threonine phosphorylation pathway controls biofilm formation in response to carbon availability in Pseudomonas aeruginosa
Source: PubMed Central journal article supplement (PMC7647112; doi:10.1371/journal.pone.0241019), 2020-11-06
Supplement: pone.0241019.s005.pdf [file pone.0241019.s005.pdf]

**A**

| Description                                   | Score     | Coverage                     | # Unique Peptides | # PSMs         | Area      | # AAs          | MW [kDa] | calc. pI       |             |              |
|-----------------------------------------------|-----------|------------------------------|-------------------|----------------|-----------|----------------|----------|----------------|-------------|--------------|
| SiaC [Pseudomonas aeruginosa PAO1: NC_002516] | 5852,44   | 73,02                        | 8                 | 318            | 1,3E+09   | 126            | 14,5     | 4,68           |             |              |
| Sequence                                      | # PSMs    | Modifications                | Area              | PEP            | IonScore  | Exp Value      | Charge   | MH+ [Da]       | ΔM [ppm]    | RT [min]     |
| AmmDILDLLLEEAHQGGRPVSLR                       | 1         | M2(Oxidation); M3(Oxidation) | 1,7E+06           | 1,6E-01        | 27        | 1,0E-02        | 4        | 2483,24        | 0,95        | 34,21        |
| AmMDILDLLLEEAHQGGRPVSLR                       | 2         | M2(Oxidation)                | 2,0E+06           | 1,1E-01        | 11        | 3,5E-01        | 4        | 2467,24        | 0,19        | 37,76        |
| AMMDILDLLLEEAHQGGRPVSLR                       | 3         |                              | 9,7E+05           | 4,8E-03        | 48        | 5,4E-05        | 3        | 2451,25        | 1,95        | 41,34        |
| EDcSFFPAIQAHDE                                | 11        | C3(Carbamidomethyl)          | 3,4E+07           | 2,7E-02        | 86        | 3,6E-09        | 2        | 1665,69        | 1,29        | 31,67        |
| FLADGQRPLELDR                                 | 75        |                              | 1,6E+09           | 1,6E-02        | 58        | 3,6E-06        | 3        | 1642,89        | 0,81        | 27,14        |
| <b>LLYLNtSSIK</b>                             | <b>34</b> | <b>T6(Phospho)</b>           | <b>1,8E+08</b>    | <b>7,7E-02</b> | <b>44</b> | <b>1,1E-04</b> | <b>2</b> | <b>1231,63</b> | <b>0,64</b> | <b>31,72</b> |
| <b>LLYLNtSSIK</b>                             | <b>95</b> |                              | <b>1,9E+09</b>    | <b>1,2E-02</b> | <b>64</b> | <b>4,0E-07</b> | <b>2</b> | <b>1151,67</b> | <b>0,28</b> | <b>26,31</b> |
| mSDLHIPGTQSTPAIQGDWQAGR                       | 26        | M1(Oxidation)                | 6,9E+07           | 3,7E-04        | 74        | 1,8E-07        | 3        | 2482,18        | 1,18        | 25,89        |
| MSDLHIPGTQSTPAIQGDWQAGR                       | 22        |                              | 4,3E+08           | 2,2E-03        | 70        | 5,0E-07        | 3        | 2466,19        | 2,35        | 27,86        |
| SDLHIPGTQSTPAIQGDWQAGR                        | 6         |                              | 6,6E+06           | 4,0E-02        | 53        | 2,0E-05        | 3        | 2335,14        | 0,58        | 27,02        |
| VAELAEFFR                                     | 29        |                              | 2,0E+08           | 1,5E-02        | 83        | 9,0E-09        | 2        | 1063,54        | 0,58        | 20,16        |
| VAELAEFFREDcSFFPAIQAHDE                       | 14        | C12(Carbamidomethyl)         | 6,3E+07           | 3,2E-04        | 92        | 2,3E-09        | 3        | 2710,21        | 1,12        | 37,01        |

**B**

| Description                                   | Score      | Coverage                     | # Unique Peptides | # PSMs         | Area      | # AAs          | MW [kDa] | calc. pI       |              |              |
|-----------------------------------------------|------------|------------------------------|-------------------|----------------|-----------|----------------|----------|----------------|--------------|--------------|
| SiaC [Pseudomonas aeruginosa PAO1: NC_002516] | 7095,27    | 76,98                        | 9                 | 427            | 3,110E9   | 126            | 14,5     | 4,68           |              |              |
| Sequence                                      | # PSMs     | Modifications                | Area              | PEP            | IonScore  | Exp Value      | Charge   | MH+ [Da]       | ΔM [ppm]     | RT [min]     |
| AmmDILDLLLEEAHQGGRPVSLR                       | 3          | M2(Oxidation); M3(Oxidation) | 5,6E+06           | 5,1E-02        | 26        | 1,3E-02        | 4        | 2483,24        | -0,13        | 34,40        |
| AmMDILDLLLEEAHQGGRPVSLR                       | 12         | M2(Oxidation)                | 7,5E+06           | 4,7E-03        | 39        | 6,1E-04        | 4        | 2467,24        | -0,01        | 37,47        |
| AMMDILDLLLEEAHQGGRPVSLR                       | 2          |                              | 3,9E+06           | 2,2E-02        | 50        | 3,6E-05        | 3        | 2451,25        | 1,21         | 40,80        |
| EDcSFFPAIQAHDE                                | 3          | C3(Carbamidomethyl)          | 9,1E+06           | 1,9E-02        | 80        | 1,3E-08        | 2        | 1665,69        | 1,51         | 31,76        |
| FLADGQRPLELDR                                 | 121        |                              | 3,8E+09           | 9,0E-03        | 49        | 2,6E-05        | 3        | 1642,89        | 0,81         | 28,62        |
| <b>LLYLNtSSIK</b>                             | <b>7</b>   | <b>T6(Phospho)</b>           | <b>1,6E+07</b>    | <b>8,0E-02</b> | <b>31</b> | <b>2,0E-03</b> | <b>2</b> | <b>1231,63</b> | <b>-0,84</b> | <b>30,93</b> |
| <b>LLYLNtSSIK</b>                             | <b>178</b> |                              | <b>3,7E+09</b>    | <b>7,3E-03</b> | <b>56</b> | <b>2,5E-06</b> | <b>2</b> | <b>1151,67</b> | <b>0,49</b>  | <b>26,13</b> |
| mSDLHIPGTQSTPAIQGDWQAGR                       | 37         | M1(Oxidation)                | 3,0E+08           | 1,3E-03        | 73        | 2,4E-07        | 3        | 2482,18        | 2,29         | 26,48        |
| MSDLHIPGTQSTPAIQGDWQAGR                       | 41         |                              | 1,8E+09           | 9,9E-04        | 74        | 2,0E-07        | 3        | 2466,18        | 0,12         | 28,11        |
| SDLHIPGTQSTPAIQGDWQAGR                        | 5          |                              | 1,7E+07           | 2,3E-03        | 55        | 1,3E-05        | 3        | 2335,15        | 1,05         | 26,00        |
| VAELAEFFR                                     | 4          |                              | 5,7E+07           | 5,3E-03        | 79        | 1,8E-08        | 2        | 1063,54        | 0,12         | 20,73        |
| VAELAEFFREDcSFFPAIQAHDE                       | 12         | C12(Carbamidomethyl)         | 5,8E+07           | 4,9E-03        | 85        | 1,3E-08        | 3        | 2710,21        | 1,12         | 37,76        |
| WHYDR                                         | 2          |                              | 1,6E+06           | 1,4E-01        | 21        | 7,5E-03        | 2        | 776,35         | -0,08        | 7,76         |

**C**

| Description                                   | Score      | Coverage                     | # Unique Peptides | # PSMs         | Area      | # AAs          | MW [kDa] | calc. pI       |             |              |
|-----------------------------------------------|------------|------------------------------|-------------------|----------------|-----------|----------------|----------|----------------|-------------|--------------|
| SiaC [Pseudomonas aeruginosa PAO1: NC_002516] | 9385,72    | 92,86                        | 9                 | 501            | 2,115E9   | 126            | 14,5     | 4,68           |             |              |
| Sequence                                      | # PSMs     | Modifications                | Area              | PEP            | IonScore  | Exp Value      | Charge   | MH+ [Da]       | ΔM [ppm]    | RT [min]     |
| AmmDILDLLLEEAHQGGRPVSLR                       | 34         | M2(Oxidation); M3(Oxidation) | 2,3E+08           | 7,6E-12        | 63        | 2,6E-06        | 4        | 2483,24        | 0,56        | 36,38        |
| AmMDILDLLLEEAHQGGRPVSLR                       | 60         | M2(Oxidation)                | 3,6E+08           | 5,3E-11        | 74        | 2,1E-07        | 3        | 2467,25        | 1,45        | 37,62        |
| AMMDILDLLLEEAHQGGRPVSLR                       | 9          |                              | 6,2E+07           | 6,8E-11        | 78        | 5,3E-08        | 3        | 2451,25        | 1,58        | 41,24        |
| EDcSFFPAIQAHDE                                | 15         | C3(Carbamidomethyl)          | 3,6E+07           | 4,7E-08        | 74        | 4,5E-08        | 2        | 1665,69        | 1,65        | 31,93        |
| FLADGQRPLELDR                                 | 105        |                              | 2,5E+09           | 4,6E-06        | 50        | 2,0E-05        | 3        | 1642,89        | 1,03        | 28,38        |
| <b>LLYLNtSSIK</b>                             | <b>4</b>   | <b>T6(Phospho)</b>           | <b>1,3E+06</b>    | <b>3,7E-02</b> | <b>31</b> | <b>1,8E-03</b> | <b>2</b> | <b>1231,63</b> | <b>0,74</b> | <b>31,34</b> |
| <b>LLYLNtSSIK</b>                             | <b>135</b> |                              | <b>2,9E+09</b>    | <b>1,4E-06</b> | <b>70</b> | <b>9,8E-08</b> | <b>2</b> | <b>1151,67</b> | <b>0,71</b> | <b>25,31</b> |
| LsmQGDSYPENSYELFGQVWVVER                      | 1          | M3(Oxidation)                | 4,3E+05           | 3,8E-03        | 17        | 1,2E-01        | 3        | 2978,36        | 3,08        | 51,39        |
| mSDLHIPGTQSTPAIQGDWQAGR                       | 38         | M1(Oxidation)                | 1,6E+08           | 7,5E-13        | 80        | 5,3E-08        | 3        | 2482,18        | 1,99        | 26,96        |
| MSDLHIPGTQSTPAIQGDWQAGR                       | 32         |                              | 8,4E+08           | 1,7E-11        | 65        | 1,9E-06        | 3        | 2466,19        | 1,46        | 29,36        |
| SDLHIPGTQSTPAIQGDWQAGR                        | 7          |                              | 9,5E+06           | 5,5E-10        | 58        | 6,8E-06        | 3        | 2335,14        | -0,20       | 27,47        |
| VAELAEFFR                                     | 2          |                              | 1,6E+07           | 7,1E-09        | 66        | 4,4E-07        | 2        | 1063,54        | 0,35        | 21,04        |
| VAELAEFFREDcSFFPAIQAHDE                       | 59         | C12(Carbamidomethyl)         | 9,9E+08           | 1,0E-14        | 94        | 1,6E-09        | 3        | 2710,21        | 1,66        | 38,88        |

**D**

| Description                                   | Score     | Coverage                     | # Unique Peptides | # PSMs         | Area      | # AAs          | MW [kDa] | calc. pI       |             |              |
|-----------------------------------------------|-----------|------------------------------|-------------------|----------------|-----------|----------------|----------|----------------|-------------|--------------|
| SiaC [Pseudomonas aeruginosa PAO1: NC_002516] | 7632,28   | 76,98                        | 9                 | 428            | 1,494E9   | 126            | 14,5     | 4,68           |             |              |
| Sequence                                      | # PSMs    | Modifications                | Area              | PEP            | IonScore  | Exp Value      | Charge   | MH+ [Da]       | ΔM [ppm]    | RT [min]     |
| AmmDILDLLLEEAHQGGRPVSLR                       | 14        | M2(Oxidation); M3(Oxidation) | 6,0E+07           | 3,1E-08        | 54        | 1,7E-05        | 3        | 2483,24        | 1,40        | 33,95        |
| AmMDILDLLLEEAHQGGRPVSLR                       | 32        | M2(Oxidation)                | 5,8E+07           | 3,1E-09        | 79        | 5,7E-08        | 3        | 2467,26        | 4,87        | 37,37        |
| AMMDILDLLLEEAHQGGRPVSLR                       | 2         |                              | 7,6E+06           | 4,7E-09        | 51        | 2,7E-05        | 3        | 2451,25        | 0,61        | 40,99        |
| EDcSFFPAIQAHDE                                | 19        | C3(Carbamidomethyl)          | 9,7E+07           | 1,1E-09        | 76        | 3,6E-08        | 2        | 1665,69        | 0,48        | 31,85        |
| FLADGQRPLELDR                                 | 83        |                              | 1,8E+09           | 1,0E-08        | 54        | 9,3E-06        | 3        | 1642,89        | 0,03        | 29,62        |
| <b>LLYLNtSSIK</b>                             | <b>91</b> | <b>T6(Phospho)</b>           | <b>1,5E+09</b>    | <b>3,2E-05</b> | <b>60</b> | <b>2,7E-06</b> | <b>2</b> | <b>1231,63</b> | <b>1,24</b> | <b>39,61</b> |
| <b>LLYLNtSSIK</b>                             | <b>30</b> |                              | <b>2,7E+08</b>    | <b>8,9E-09</b> | <b>66</b> | <b>2,3E-07</b> | <b>2</b> | <b>1151,67</b> | <b>0,49</b> | <b>25,10</b> |
| mSDLHIPGTQSTPAIQGDWQAGR                       | 48        | M1(Oxidation)                | 4,2E+08           | 2,2E-15        | 100       | 4,3E-10        | 3        | 2482,18        | 2,29        | 26,70        |
| MSDLHIPGTQSTPAIQGDWQAGR                       | 43        |                              | 1,1E+09           | 1,9E-12        | 75        | 2,0E-07        | 3        | 2466,19        | 2,27        | 28,50        |
| SDLHIPGTQSTPAIQGDWQAGR                        | 5         |                              | 1,1E+07           | 1,2E-08        | 53        | 1,9E-05        | 3        | 2335,15        | 2,39        | 26,68        |
| VAELAEFFR                                     | 5         |                              | 4,6E+07           | 4,1E-09        | 79        | 1,8E-08        | 2        | 1063,54        | 0,24        | 21,09        |
| VAELAEFFREDcSFFPAIQAHDE                       | 54        | C12(Carbamidomethyl)         | 7,6E+08           | 5,0E-14        | 88        | 7,1E-09        | 3        | 2710,22        | 2,40        | 37,59        |
| WHYDR                                         | 2         |                              | 1,4E+06           | 2,0E-01        | 21        | 7,8E-03        | 2        | 776,35         | 0,08        | 7,76         |
