# Supplementary material for: The SiaABC threonine phosphorylation pathway controls biofilm formation in response to carbon availability in Pseudomonas aeruginosa
Source: PubMed Central journal article supplement (PMC7647112; doi:10.1371/journal.pone.0241019), 2020-11-06
Supplement: pone.0241019.s006.pdf [file pone.0241019.s006.pdf]

|                                         | <b>SiaA Native</b>               | <b>SiaA SeMet</b>                 | <b>SiaC Native</b>               | <b>SiaC SeMet</b>                |
|-----------------------------------------|----------------------------------|-----------------------------------|----------------------------------|----------------------------------|
| <b>Wavelength (Å)</b>                   | 0.9764                           | 0.979                             | 0.9801                           | 0.9766                           |
| <b>Resolution range (Å)</b>             | 49.81 - 2.094<br>(2.169 - 2.094) | 27.35 - 2.49<br>(2.579 - 2.49)    | 57.96 - 1.735<br>(1.797 - 1.735) | 38.74 - 2.94<br>(3.045 - 2.94)   |
| <b>Space group</b>                      | P 21 21 21                       | P 21 21 21                        | I 2 2 2                          | P 31 2 1                         |
| <b>Unit cell (Å)</b>                    | 51.17 110.48<br>111.6 90 90 90   | 51.354 109.416<br>111.46 90 90 90 | 35.4 72.8 95.8<br>90 90 90       | 77.482 77.482<br>85.02 90 90 120 |
| <b>Total reflections</b>                | 205960 (19009)                   | 606993 (59041)                    | 116718 (7271)                    | 130598 (12091)                   |
| <b>Unique reflections</b>               | 37739 (3471)                     | 22684 (2229)                      | 13113 (1176)                     | 6550 (603)                       |
| <b>Multiplicity</b>                     | 5.5 (5.5)                        | 26.8 (26.5)                       | 8.9 (6.2)                        | 19.9 (19.9)                      |
| <b>Completeness (%)</b>                 | 99.18 (93.11)                    | 99.85 (99.82)                     | 98.94 (90.81)                    | 99.53 (96.20)                    |
| <b>Mean I/sigma (I)</b>                 | 7.20 (0.99)                      | 20.17 (1.65)                      | 12.05 (0.90)                     | 21.22 (1.56)                     |
| <b>Wilson B-factor (Å<sup>2</sup>)</b>  | 41.65                            | 66.72                             | 34.21                            | 97.73                            |
| <b>R-merge</b>                          | 0.1603 (1.432)                   | 0.1411 (1.813)                    | 0.09846<br>(1.129)               | 0.1306 (1.444)                   |
| <b>CC1/2</b>                            | 0.993 (0.461)                    | 0.998 (0.752)                     | 0.998 (0.62)                     | 0.999 (0.784)                    |
| <b>R-work</b>                           | 0.2177 (0.3346)                  | 0.2055 (0.2768)                   | 0.1972<br>(0.3956)               | 0.2122 (0.3450)                  |
| <b>R-free</b>                           | 0.2522 (0.3782)                  | 0.2542 (0.3665)                   | 0.2348<br>(0.4305)               | 0.2812 (0.4126)                  |
| <b>RMS (bonds) (Å)</b>                  | 0.014                            | 0.014                             | 0.008                            | 0.015                            |
| <b>RMS (angles) (°)</b>                 | 1.71                             | 1.77                              | 1.19                             | 1.82                             |
| <b>Ramachandran outliers (%)</b>        | 0.00                             | 0.00                              | 0.00                             | 0.41                             |
| <b>Rotamer outliers (%)</b>             | 3.73                             | 4.07                              | 0.00                             | 12.50                            |
| <b>Clashscore</b>                       | 2.80                             | 3.23                              | 2.65                             | 8.62                             |
| <b>Average B-factor (Å<sup>2</sup>)</b> | 53.79                            | 71.23                             | 43.58                            | 106.10                           |
