# Supplementary material for: The SiaABC threonine phosphorylation pathway controls biofilm formation in response to carbon availability in Pseudomonas aeruginosa
Source: PubMed Central journal article supplement (PMC7647112; doi:10.1371/journal.pone.0241019), 2020-11-06
Supplement: pone.0241019.s007.pdf [file pone.0241019.s007.pdf]

| Strains                     | Relevant features                                                                                                                                                                                                                                                                            | Reference                        |
|-----------------------------|----------------------------------------------------------------------------------------------------------------------------------------------------------------------------------------------------------------------------------------------------------------------------------------------|----------------------------------|
| <b><i>P. aeruginosa</i></b> |                                                                                                                                                                                                                                                                                              |                                  |
| PAO1                        | Wild-type <i>Pseudomonas aeruginosa</i>                                                                                                                                                                                                                                                      | Holloway Collection              |
| $\Delta$ <i>siaA</i>        | PAO1 with a 6 bp deletion in <i>siaA</i>                                                                                                                                                                                                                                                     | [1]                              |
| $\Delta$ <i>siaB</i>        | PAO1 with a markerless <i>loxP</i> -site insertion in <i>siaB</i> (PA0171)                                                                                                                                                                                                                   | This study                       |
| $\Delta$ <i>siaC</i>        | PAO1 with a markerless <i>loxP</i> -site insertion in <i>siaC</i> (PA0170)                                                                                                                                                                                                                   | This study                       |
| $\Delta$ <i>siaD</i>        | PAO1 with a markerless <i>res</i> -site insertion in <i>siaD</i> (KO0169)                                                                                                                                                                                                                    | [1]                              |
| PW1292                      | MPAO1 with transposon phoAwp091G03 inserted at bp 311 of the coding region of the <i>siaB</i> gene[                                                                                                                                                                                          | [2]                              |
| PW1290                      | MPAO1 with transposon phoAwp09q2A10 inserted at bp 181 of the coding region of the <i>siaC</i> gene                                                                                                                                                                                          | [2]                              |
| <b><i>E. coli</i></b>       |                                                                                                                                                                                                                                                                                              |                                  |
| DH5 $\alpha$                | <i>fhuA2 lac(del)U169 phoA glnV44 <math>\Phi</math>80' lacZ(del)M15 gyrA96 recA1 relA1 endA1 thi-1 hsdR17</i>                                                                                                                                                                                | [3]                              |
| S17- $\lambda$ pir          | Tp <sup>r</sup> Sm <sup>r</sup> <i>recA, thi, pro, hsdR</i> -M <sup>+</sup> RP4: 2-Tc:Mu: Km <sup>r</sup> Tn7 $\lambda$ pir                                                                                                                                                                  | [4]                              |
| BL21(DE3) Rosetta T1R       | <i>E. coli</i> str. B F <sup>-</sup> <i>ompT gal dcm lon hsdS<sub>B</sub>(r<sub>B</sub><sup>-</sup>m<sub>B</sub><sup>-</sup>) <math>\lambda</math>(DE3 [<i>lacI lacUV5-T7p07 ind1 sam7 nin5</i>]) [<i>malB</i><sup>+</sup>]<sub>K-12</sub>(<math>\lambda</math><sup>S</sup>) <i>tonA</i></i> | NTU Protein Production Plattform |
| <b>Plasmids</b>             |                                                                                                                                                                                                                                                                                              |                                  |
| pCR2.1                      | TOPO TA cloning plasmid, Amp <sup>r</sup> , Kan <sup>r</sup>                                                                                                                                                                                                                                 | Invitrogen                       |
| pBBR                        | Broad host range expression plasmid pBBR1MCS-5, Gm <sup>r</sup>                                                                                                                                                                                                                              | [5]                              |
| pJEM1                       | Rhamnose inducible broad host range expression plasmid, Kan <sup>r</sup>                                                                                                                                                                                                                     | [6]                              |
| pNIC28-BSA4                 | Protein production plasmid, N-terminal His6, TEV-cleavable MHHHHHHSSGVDLGTENLYFQ*SM, Kan <sup>r</sup>                                                                                                                                                                                        | [7]                              |
| pNIC-CTHF                   | Protein production plasmid, Cleavable C-terminal His6-FLAG tag, Kan <sup>r</sup>                                                                                                                                                                                                             | [7]                              |
| pNIC[SiaA]                  | pNIC28-BSA4 harbouring the partial <i>siaA</i> gene (C-terminal phosphatase domain from amino acid 386-663) for the production of a N-terminal His6-TEV-SiaA allele (SiaA-PP2C).                                                                                                             | This study                       |
| pNIC[SiaB]                  | pNIC28-BSA4 for the production of a N-terminal His6-TEC SiaB allele                                                                                                                                                                                                                          | This study                       |
| pNIC[SiaC]                  | pNIC28-BSA4 for the production of a N-terminal His6-TEV-SiaC allele                                                                                                                                                                                                                          | This study                       |
| pJEM[SiaC]                  | pJEM1 harbouring the <i>siaC</i> gene for the production of a N-terminal His6-TEV-SiaC allele in <i>Pseudomonas aeruginosa</i> strains                                                                                                                                                       | This study                       |
| pCre1                       | Plasmid for the expression of Cre recombinase                                                                                                                                                                                                                                                | [8]                              |
| <b>Phage</b>                |                                                                                                                                                                                                                                                                                              |                                  |
| E79tv2                      | Generalised transducing phage                                                                                                                                                                                                                                                                | [9]                              |

## References

1. Klebensberger, J., Birkenmaier, A., Geffers, R., Kjelleberg, S. & Philipp, B. SiaA and SiaD are essential for inducing autoaggregation as a specific response to detergent stress in *Pseudomonas aeruginosa*. *Environ Microbiol.* 2009;11: 3073–3086.
2. Jacobs, M. A. *et al.* Comprehensive transposon mutant library of *Pseudomonas aeruginosa*. *Proc Natl Acad Sci.* 2003;100: 14339–14344.
3. Bethesda Research Laboratories. *E. coli* DH5 alpha competent cells. *Focus-Bethesda Res Lab.* 1986;8:9.
4. Simon, R., Priefer, U. & Pühler, A. A broad host range mobilization system for in vivo genetic engineering: Transposon mutagenesis in gram negative bacteria. *Bio/Technology* **1**, 784–791 (1983). Lämmli, U. K. Cleavage of Structural Proteins during the Assembly of the Head of Bacteriophage T4. *Nature.* 1970;227: 680–685.
5. Kovach, M. E. *et al.* Four new derivatives of the broad-host-range cloning vector pBBR1MCS, carrying different antibiotic-resistance cassettes. *Gene.* 1995;166: 175-176.
6. Jeske, M. & Altenbuchner, J. The *Escherichia coli* rhamnose promoter rhaP BAD is in *Pseudomonas putida* KT2440 independent of Crp–cAMP activation. *Appl Microbiol Biotechnol.* 2010;85: 1923–1933.
7. Savitsky, P. *et al.* High-throughput production of human proteins for crystallization: The SGC experience. *J Struct Biol.* 2010;172: 3–13.
8. Bailey, J. A. *et al.* Recent segmental duplications in the human genome. *Science.* 2002;297: 1003–1007.
9. Morgan, A. F. Transduction of *Pseudomonas aeruginosa* with a mutant of bacteriophage E79. *J Bacteriol.* 1979;139: 137–140.
