# Supplementary material for: The SiaABC threonine phosphorylation pathway controls biofilm formation in response to carbon availability in Pseudomonas aeruginosa
Source: PubMed Central journal article supplement (PMC7647112; doi:10.1371/journal.pone.0241019), 2020-11-06
Supplement: pone.0241019.s008.pdf [file pone.0241019.s008.pdf]

| Gene/Construct | Primer name and sequence (5' to 3') |                                                          |
|----------------|-------------------------------------|----------------------------------------------------------|
| SiaA-PP2C      | SiaA-f6117                          | TACTTCCAATCCATGCGGCACACCGCCGAGCT                         |
|                | SiaA-r6103                          | TATCCACCTTTACTGTCAGTCGAATCGGAAGGACAGG                    |
| SiaB           | SiaB-f6118                          | TACTTCCAATCCATGATGGAAACGCTAGACCTGCT                      |
|                | SiaB-r6104                          | TATCCACCTTTACTGTCATCAGATCACGGCGCGCAG                     |
| SiaC           | SiaC-f6119                          | TACTTCCAATCCATGATGAGTGACCTGCACATACC                      |
|                | SiaC-r6105                          | TATCCACCTTTACTGTCACTACTCGTCGTGGGCCTG                     |
| His6-TEV-SiaC  | His_TEV_SiaC_F                      | ACAATTCTTAAGAAGGAGATATAACAATGCACCATCATCATC<br>ATCATTCTTC |
|                | His_TEV_SiaC_R                      | GCTTCCGGTAGTCAATAAACCGGTACTACTCGTCGTGGGC<br>CT           |
