# Supplementary material for: The SiaABC threonine phosphorylation pathway controls biofilm formation in response to carbon availability in Pseudomonas aeruginosa
Source: PubMed Central journal article supplement (PMC7647112; doi:10.1371/journal.pone.0241019), 2020-11-06
Supplement: pone.0241019.s009.pdf [file pone.0241019.s009.pdf]

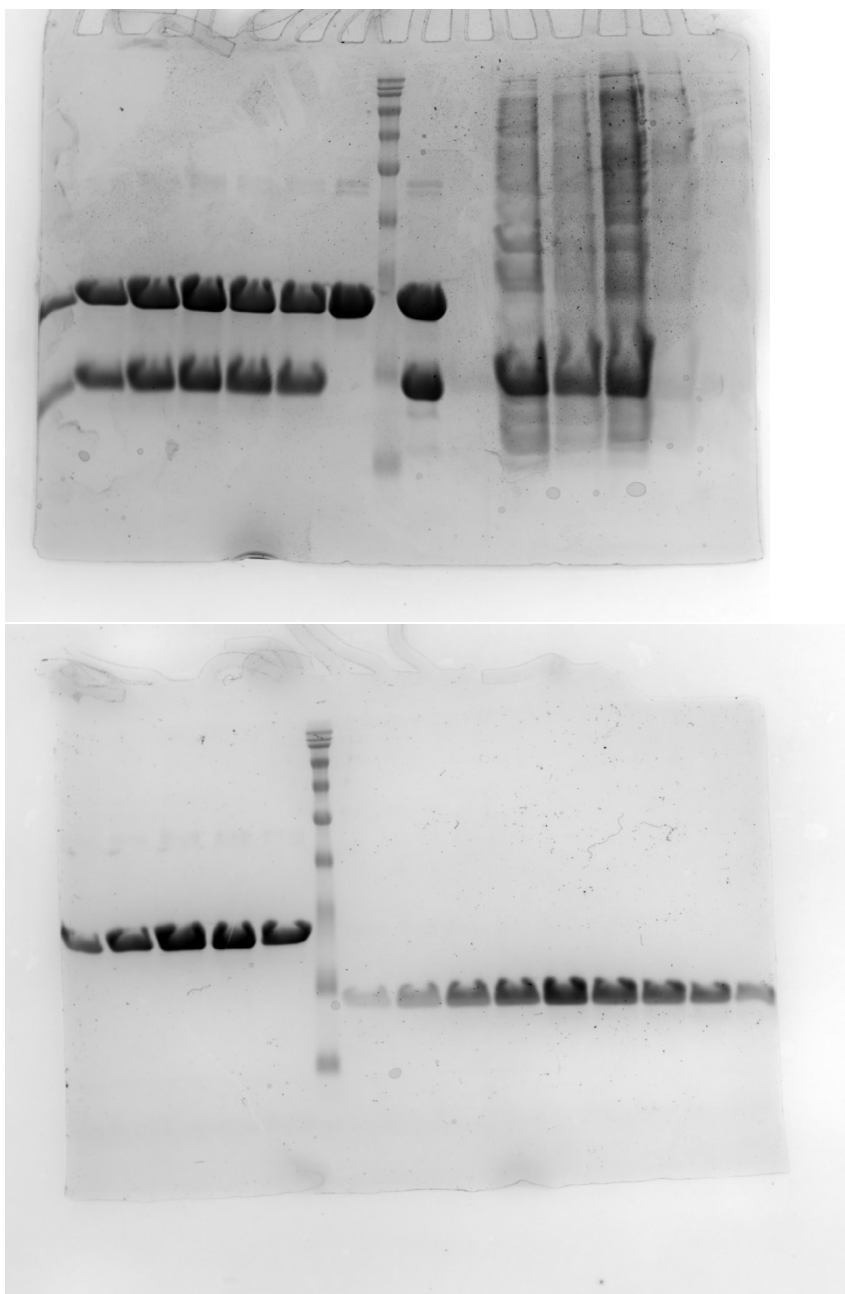

Original gel pictures for Figure 6E (SiaB/SiaC complex).

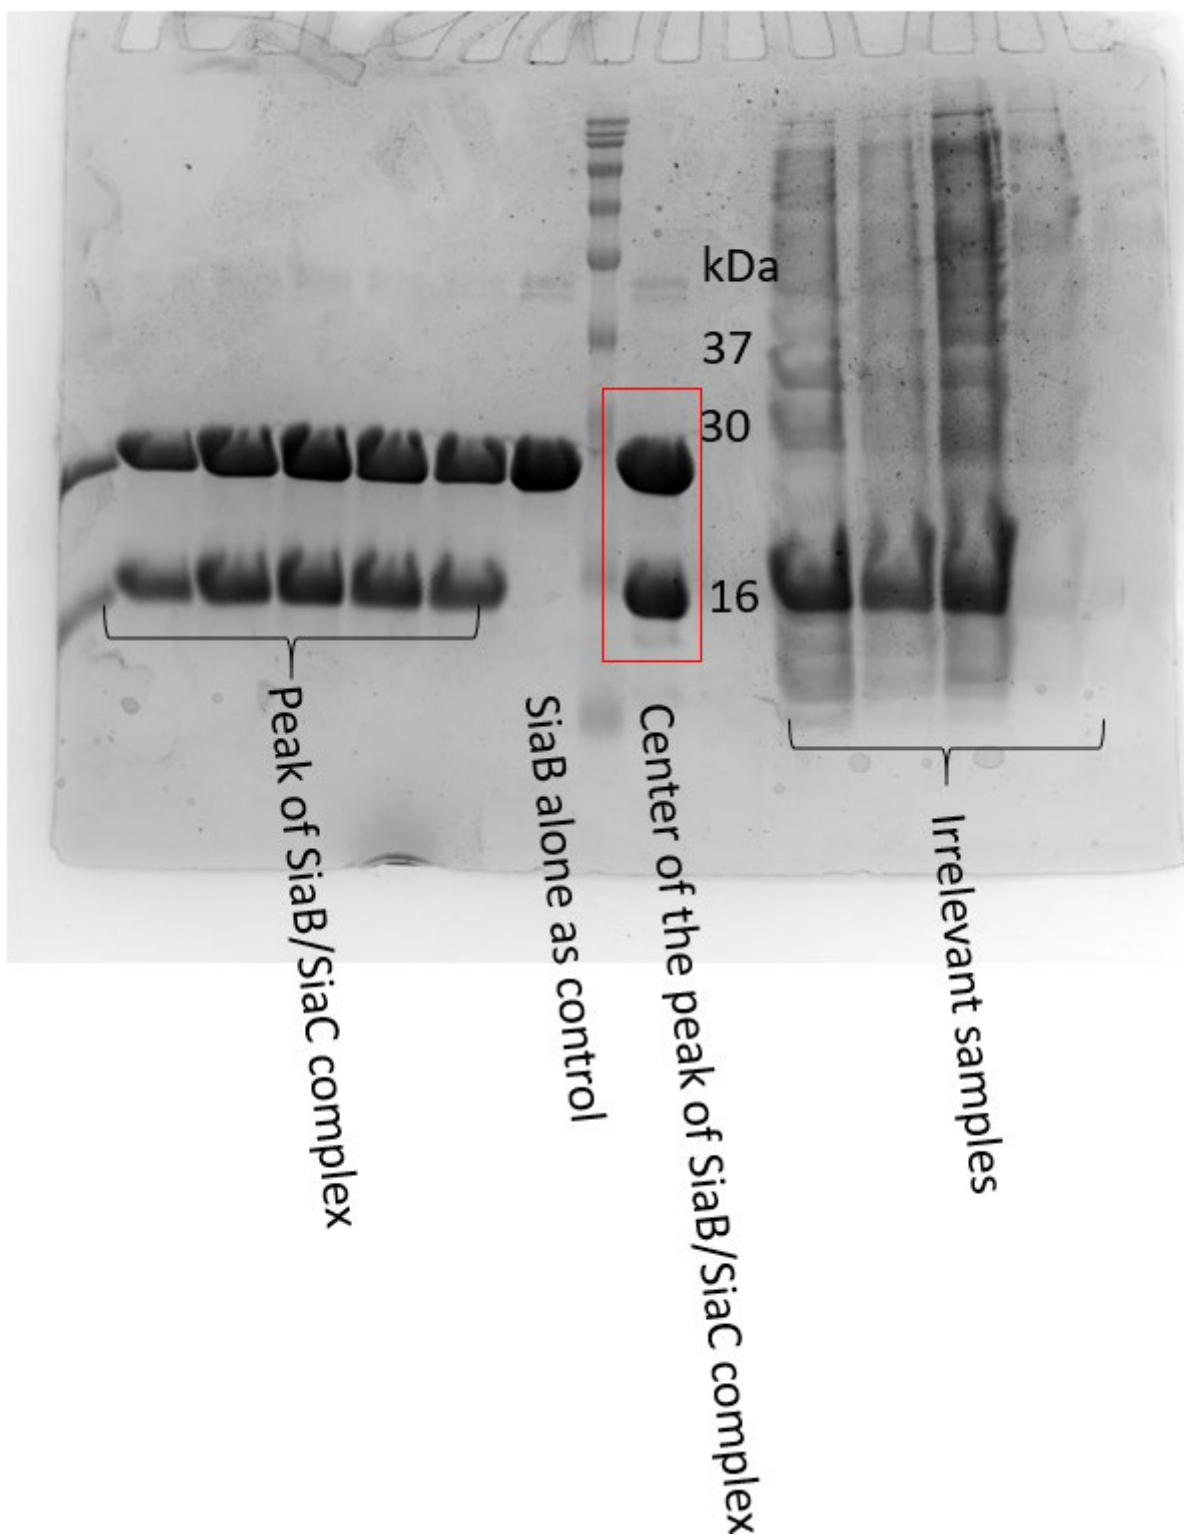

Original gel pictures for Figure 6E (Siab/Siac complex) with annotation. The area in red rectangle was cropped out for publication.

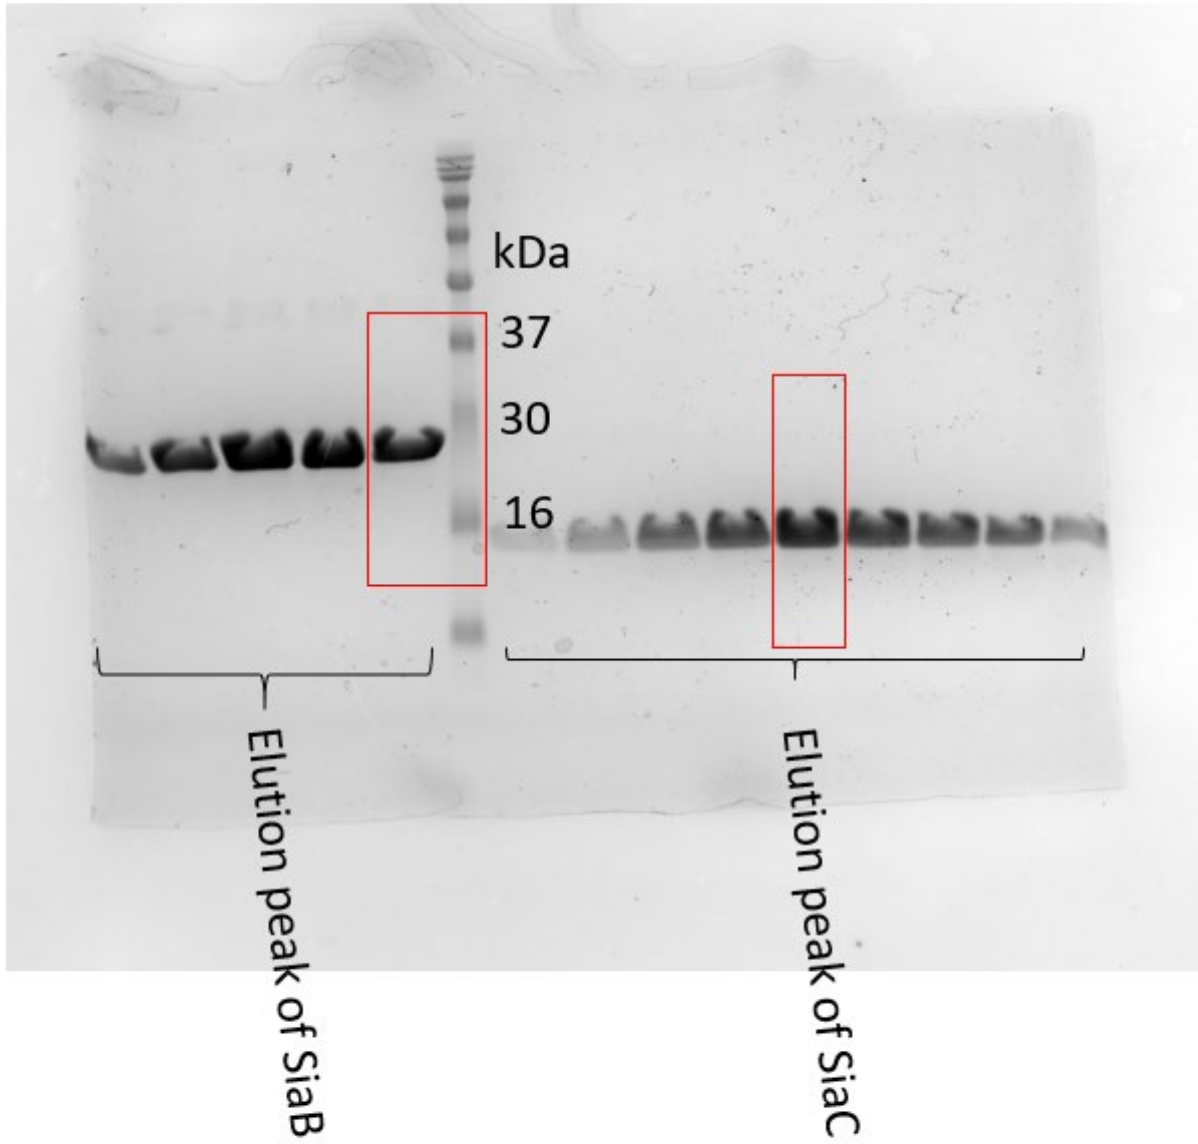

Original gel picture for Figure 6E (SiaB/SiaC complex dissociation) with annotation. The area in red rectangle was cropped out for publication.

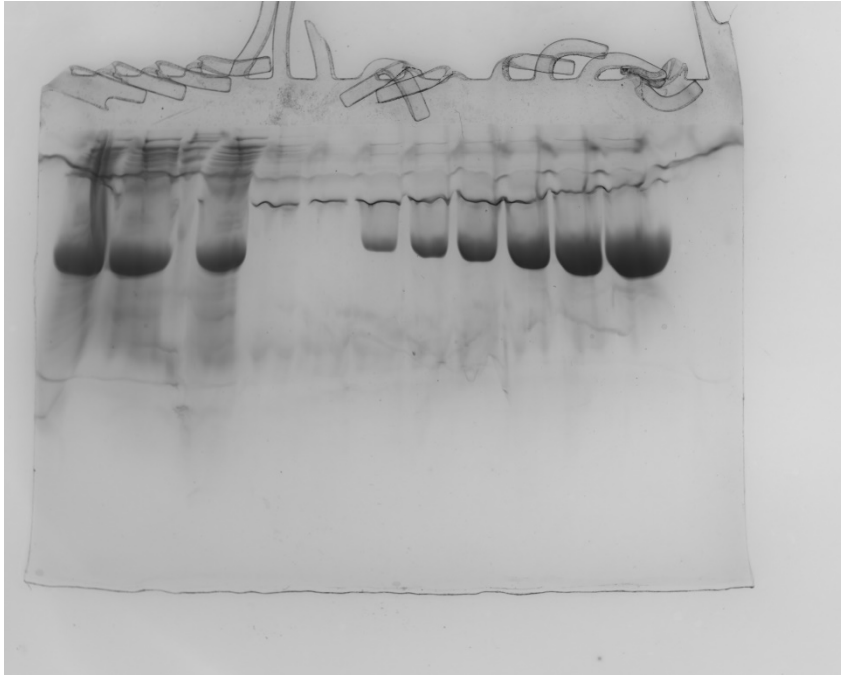

Original gel picture for Figure 6E (SiaB/SiaC complex dissociation) with annotation. The area in red rectangle was cropped out for publication.

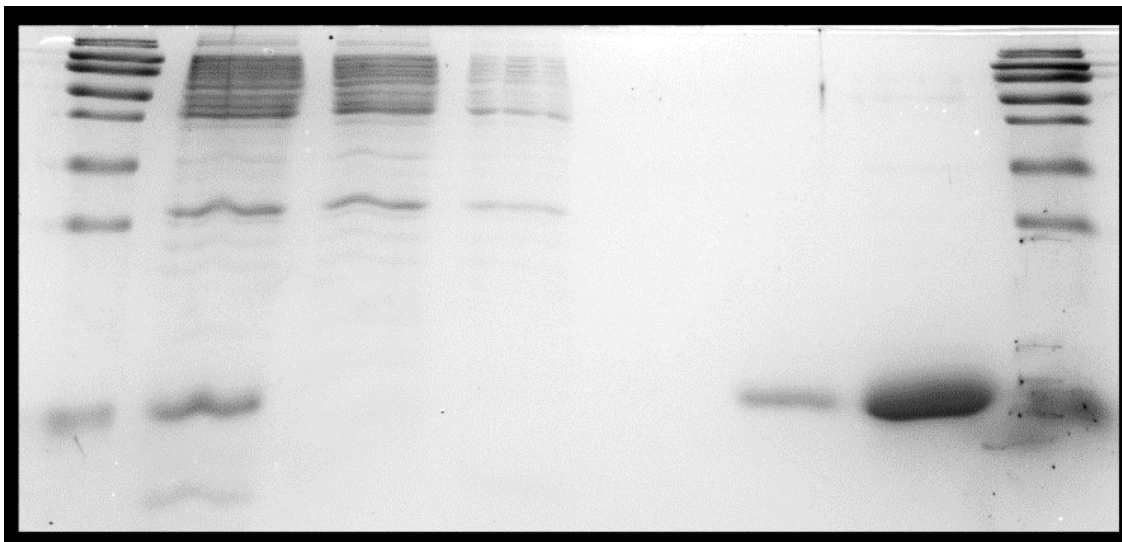

Original gel picture for Figure S2B (purification of SiaC<sup>P</sup>)
