# Supplementary material for: The SiaABC threonine phosphorylation pathway controls biofilm formation in response to carbon availability in Pseudomonas aeruginosa
Source: PLoS One. 2020 Nov 6;15(11):e0241019. doi: 10.1371/journal.pone.0241019 (PMC7647112; doi:10.1371/journal.pone.0241019)
Supplement: S4 Fig — Conserved residues are highlighted in red. Secondary structure features and residue number of SiaA-PP2C are labelled on top of the alignment. (PDF) [file pone.0241019.s004.pdf]

**SiaA**      450      460      470      480      490  
**SiaA**      HHFILWKPR..D...VVG **GD** F Y V Y R E Q . A D G Y L I G V V **DCA** **GH** **GV** P G A L M T M L A R A A I D H A  
**Rv1364C**    D I A A E Y L V A . . A E D T A A G **GD** W F D A L A L . G D R L V L V V G **DV** **VG** **GH** V E A A A V M S Q L R T A L R M Q  
**SpoIIE**    S T G A A H A A K . . G . G G L V S **GD** S Y S M M E L G A R K Y A A A I S **DGM** **CN** **GA** R A H F E S N E T I K L L E K I  
**RsbX**      Q T L V Y Q L N K E G K . . S I C **GD** S F F M K A D . D K E L I C A V A **DGL** **GS** **GS** L A N E S S A A I K D L V E N Y  
**MtX**       E V G I Y T R A R E G E . . I A C **GD** A C L V K R V . E G V I F L A V G **DGI** **GH** **GH** P E A A R A A E I A I A S M E S S  
**Stp-1**    E A Q F F T D T G Q H R . . D K N **ED** A G G I F Y N Q T N Q Q L L V L C **DGM** **GH** **GH** K A G E V A S K F V T D E L K S R

**SiaA**      500      510      520      530      540      550  
**SiaA**      I E A V G S R . . . . . D P A A I L G E T D Q A M R S M L S Q E Q I P Q A L A T N M D A G L V W V D R R R R Q L A F  
**Rv1364C**    I S A G Y . . . . . T V V E A L E A V D R F H K Q V P . . . . . G S K S A T M C V G S L D F T S G E F Q Y  
**SpoIIE**    L E S G I . . . . . D E K I A I K T I N S I L S . . L R T . . . . . T D E I Y S T L D L S I D L Q D A S C K F  
**RsbX**      A . . . . S E . . . . . D V E S I I E R C N Q A M K . . . . . N . K R G A T A S I L K I N F E Q R Q F T Y  
**MtX**       M . . . . N T . . . . . G L V N I F Q L C H R E L R . . . . . G . T R G A V A A L C R V D R R Q G L W Q A  
**Stp-1**    F E A E N L I E Q H Q A E N W L R N N I K D I N F Q L Y H Y A . Q E N A E Y K . G M G T T C V C A L V F E . . K S V V I

**SiaA**      550      560      570  
**SiaA**      A G A . K . I . S L Y A S D . G E E V Q E L K G . A R . . . . . R A I . G D  
**Rv1364C**    C T A . G . H P P P L L V T A D A S A R Y V E P T A . . . . . G P L . G S  
**SpoIIE**    L K V G S . T . P S F I K R . G D Q V M K V Q A . S N . . . . . L P I . G I  
**RsbX**      C S V . G N V . R F I L H S P S G E S F Y P L P . I S . . . . . G Y L . S G  
**MtX**       A I V . G N I . H V K I L S . A K G I I T P L A . T P . . . . . G I L G Y N  
**Stp-1**    A N V . G D S . R A Y V I N . S R Q I E Q I T S . D H S F V N H L V L T G Q I T P E E A F T H P Q R N I I T K V M . G T

**SiaA**      580      590      600      610      620  
**SiaA**      K R R G D . . Y R N I E V P L A P **GW** T F Y L S T **DG** F L D Q A G G E H G F G F . . G S R R F A D M L R D H A R . Q . .  
**Rv1364C**    . . G T G . . F P V R S E V L N I **GD** A I L F Y T **DG** L I E R P . . . . G R P L E A S T A E F A D L A A S I A S A R . .  
**SpoIIE**    I N E F D . . V E V V S E Q L K A **GD** L L I M M S **DG** I F E G P K . . H V E N . . H D L W M K R K M K G L K T . N . .  
**RsbX**      . K P Q K . . Y K T H T A T Y E K **GS** K F I I H T **DGL** N . . . . . V P D I R S H L K K G . . Q . .  
**MtX**       . . . Y P H Q L L I A K G S Y Q E **GD** L F L I H S **DGI** Q . . . . . E G A V . . P L A L . L A . N . .  
**Stp-1**    D K R V S . . P D L F I K R L N F **YD** Y L L L N S **DG** L T D Y . . . . . V K D N E I K R L L V . K E G

**SiaA**      630      640      650      660  
**SiaA**      P . . . L P E Q A E A F V A T L A E Y Q G E H P Q R **DD** I **TI** L S F R F D  
**Rv1364C**    P . . . I D R L C S D T L E L L L R S T . . . G Y N **DD** V **TI** L L A M Q R R  
**SpoIIE**    D . . . P Q E I A D L L M E E V I R T R S . G Q I E **DD** M **TI** V V V V R I D  
**RsbX**      S . . . V E E I S N S L K M Y T T . . . . . S R K **DD** L **TI** Y I L G Q L S  
**MtX**       Y R L T A E E L V R L I G E K Y . . . . . G R R D **DD** V A V I V A R . .  
**Stp-1**    T . . . I E D H G D Q L M Q L A L D N H . . . . S K **DN** V **TI** F I L A A I E
